# Supplementary material for: AuNP-peptide probe for caspase-3 detection in living cells by SERS
Source: Royal Society of Chemistry journal article supplement (doi:10.1039/c8an02145g), 2018-11-29
Supplement: c8an02145g1.pdf [file c8an02145g1.pdf]

## Supporting Information

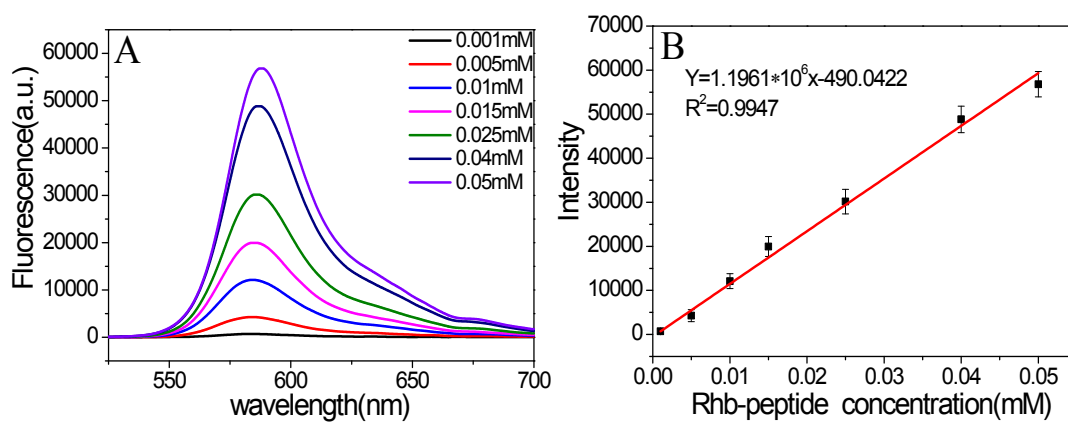

**Fig. S1** (A) Fluorescence emission spectra of the Rhb-peptide after excitation at 355 nm. (B) Calibration curve for intensity at 580 nm versus varying concentrations of Rhb-peptide after excitation at 355 nm.

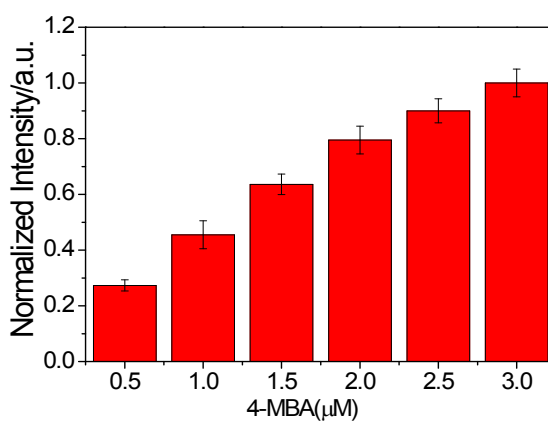

**Fig. S2** Effect of concentration of 4-MBA on normalized Raman intensity at 1077 cm<sup>-1</sup>
